# Supplementary material for: A comparative study on the lipid layer thickness analysis of medical staff before and after work
Source: PeerJ. 2024 Oct 31;12:e18258. doi: 10.7717/peerj.18258 (PMC11531743; doi:10.7717/peerj.18258)
Supplement: Supplemental Information 1 [file peerj-12-18258-s001.xls]

## Sheet: Sheet1
	Name	Date of birth	Gender	Check date	Average LLT of four quadrants before work（OD）（nm）	Average LLT of four quadrants before work （OS）（nm）	Average LLT of four quadrants after work （OD）（nm）	Average LLT of four quadrants after work（OS）（nm）	Average LLT of superior quadrant before work（OD）（nm）	Average LLT of lower quadrant before work （OD）（nm）	Average LLT of temporal quadrant before work （OD）（nm）	Average LLT of nasal quadrant before work（OD）（nm）	Average LLT of superior quadrant before work （OD）（nm）	Average LLT of lower quadrant before work （OD）（nm）	Average LLT of the nasal quadrant before work （OS）（nm）	Average LLT of the temporal quadrant before work （OS）（nm）	Average LLT of superior quadrant after work（OD）（nm）	Average LLT of lower quadrant after work（OD）（nm）	Average LLT of nasal quadrant after work（OD）（nm）	Average LLT of temporal quadrant after work（OD）（nm）	Average LLT of superior quadrant after work（OS）（nm）	Average LLT of lower quadrant after work（OS）（nm）	Average LLT of nasal quadrant after work（OS）（nm）	Average LLT of temporal quadrant after work（OS）（nm）	Tear river height before work（OD）（mm）	Tear river height before work（OS）（mm）	Tear river height after work（OD）（mm）	Tear river height after work（OS）（mm）	TBUT before work（OD）（s）	Average BUT before work（OD）（s）	TBUT before work（OS）（s）	Average BUT before work（OS）（s）	TBUT after work（OD）（s）	Average BUT after work（OD）（s）	TBUT after work（OS）（s）	Average BUT after work（OS）（s）	Blink analysis before work（OD）（%）	Blink analysis before work（OS）（%）	Blink analysis after work（OD）（%）	Blink analysis after work（OS）（%）	MG dropout in upper lids （OD）（%）	MG dropout in upper lids （OS）（%）	MG dropout in lower lids （OD）（%）	MG dropout in lower lids （OS） （%）	Lid margin abnormalities in upper lids （OD）	Lid margin abnormalities in lower lids （OD）	Lid margin abnormalities in upper lids （OS）	Lid margin abnormalities in lower lids （OS）	OSDI score
1	***	*	*	2023-04-10	71	67	69	62	60.5	72.5	67.25	68	65	73.7	66.3	66.7	63.25	82.7	66.5	68.75	67.3	50	66.25	67.75	0.27	0.21	0.16	0.2	4.52	7.58	3.96	7.1	4.48	6.8	5.44	10.8	70	70	75	70	43	34	61	72	2	2	2	2	25
2	**	*	*	2023-04-10	68	68	67	68	65.8	65.7	68.8	66.5	65	77.3	67	69	71.3	67.7	64	66	71.3	67.7	64	66	0.2	0.22	0.22	0.35	5.72	8.22	5	7.66	6.16	9.84	6.44	8.98	86	72	76	74	39	23	60	29	1	2	1	2	41.67
3	**	*	*	2023-04-10	64	62	63	62	65	67.5	65	64.5	64.5	68.5	68	68	63.5	66.5	64.5	56.7	66	67.5	64.5	65.25	0.12	0.45	0.2	0.33	5.92	10.52	6.12	9.78	6.12	11.3	5.8	11.02	79	86	77	73	19	10	30	30	1	2	1	2	20.83
4	**	*	*	2023-04-10	71	72	64	64	64.5	79.3	65.3	84.3	62	81.8	77.3	66	68	45	67	67	66.3	75.3	62.3	65.5	0.19	0.19	0.38	0.27	4.4	7.72	5.6	8.12	5.76	8.04	5.08	7.46	75	71	72	96	11	15	31	29	2	2	2	2	25
5	***	*	*	2023-04-10	63	58	64	63	67.8	66	61.3	65.3	49.5	51.3	66	65.7	63.3	65.7	65	63.5	63.3	64.5	67.5	67.8	0.23	0.21	0.17	0.14	5.84	8.76	5.44	7.28	5.04	7.64	4.24	7.16	72	100	70	73	39	32	46	100	2	2	2	2	6.25
6	***	*	*	2023-04-10	66	65	65	63	64	65	66.5	66	62.5	65	65.3	65	65.5	64.3	67	67.3	64.7	63.5	68.5	66.7	0.24	0.2	0.2	0.3	3.52	5.36	5.76	9.24	6	7.92	5.64	9.06	100	70	70	88	16	25	26	39	1	1	2	2	27.27
7	**	*	*	2023-04-10	80	73	71	66	68	87.3	69	82	62.7	87	73.3	72.5	63.5	91.3	66	67	67.8	73.3	69	82.3	0.16	0.22	0.12	0.18	5.6	7.76	5.72	8.74	4.4	7.2	5.04	7.959	73	87	74	71	24	33	60	43	2	2	2	2	54.55
8	**	*	*	2023-04-10	60	59	61	64	66.7	39.3	65.8	66.5	66.7	46.5	63	66.7	65.3	47.5	68.8	68.7	65.7	53.5	67.7	65.7	0.19	0.24	0.21	0.38	6.2	8.94	7	9.58	5.92	7.12	5.8	9.1	100	100	100	100	0	25	43	53	2	1	1	1	40.63
9	**	*	*	2023-04-10	70	68	66	62	57	84	68.5	64.5	65.8	77.5	68.5	68	63.5	70.7	66	66.5	65.5	67.5	64	65.5	0.2	0.16	0.24	0.21	3.72	9.3	5.64	7.86	5.24	7.98	5.6	8.56	100	78	100	70	28	25	41	34	2	2	2	2	61.36
10	***	*	*	2023-04-10	62	64	62	63	65.3	50.3	66.3	63.8	66.3	68.5	68	68.3	66.3	44.3	67.3	67.3	67.3	52.3	68.7	64	0.11	0.14	0.09	0.15	4.56	6.04	6.24	6.68	5.2	7.44	5.68	7.28	96	87	82	85	64	60	64	81	1	2	1	2	75
11	***	*	*	2023-04-10	67	72	73	72	64.5	70.8	67.8	72.3	66.8	84.5	68.3	65	65.5	88	65.7	69.7	66	79.8	69.8	65	0.26	0.21	0.29	0.21	5.08	7.82	10.44	10.74	5.64	8.14	5.04	6.68	71	70	100	71	23	19	21	19	2	2	2	2	31.25
12	**	*	*	2023-04-10	72	66	64	67	64.3	79.5	66.5	84.5	52	73.5	66	67.7	65	64	64	66.7	67.7	76.5	64.7	65	0.18	0.19	0.11	0.19	5.08	7.66	5.44	8.76	4.24	6.44	6.16	8.64	88	83	94	100	34	26	17	22	2	2	2	2	27.08
13	***	*	*	2023-04-10	62	65	70	67	68.5	66.5	66.5	64.5	64.5	67.3	66.5	66.5	63	74.8	65.8	67.5	64.5	72	67.7	67	0.2	0.22	0.22	0.23	5.72	7.3	4.2	6.74	7.28	9.32	5.12	8.08	88	73	75	100	24	25	43	47	1	2	1	2	38.89
14	**	*	*	2023-04-10	63	59	60	60	66.3	68	68	65.8	65.3	49.8	58.5	65.3	64.8	45.8	67.3	62	66	41	65	65.3	0.3	0.19	0.13	0.12	5.92	8.36	4.52	7.66	3.68	6.6	3.6	8.96	100	74	78	90	20	17	22	37	2	2	2	2	2.27
15	***	*	*	2023-04-10	64	66	67	69	63	64	65.5	66.5	67.5	70.5	65	66.5	68	65.7	68.5	67	65	68.3	66.5	70	0.31	0.24	0.15	0.2	5.12	7.88	5.2	7	5.04	6.76	5.08	7.58	88	71	88	90	29	32	16	8	1	1	2	2	14.58
16	***	*	*	2023-04-10	69	64	76	61	63	79	67	65.3	57	75.5	64.5	68.5	63.5	88.3	67.5	80	66.7	67.5	59.5	57	0.24	0.23	0.23	0.23	3.64	7.62	3.84	7.4	7.84	9.6	5.88	9.86	96	100	86	78	32	23	42	35	2	2	2	2	13.89
17	***	*	*	2023-04-10	65	70	73	67	67	66.7	67	66	64.3	86.3	58.5	65.3	66	90	64.5	67.5	63.5	72.3	65.3	64.3	0.17	0.14	0.2	0.21	5.8	8.22	4.96	7.88	4.08	6.12	4.84	6.14	100	100	100	100	13	14	38	27	2	2	2	2	18.75
18	***	*	*	2023-04-10	71	69	71	68	65.8	81.5	65.3	78.7	66	91.5	65	64.3	64.5	81.5	68	73	60	81.3	72.3	66.3	0.17	0.16	0.1	0.12	5.64	7.18	5.88	7.62	5.48	7.42	3.76	5.72	100	78	71	93	23	44	34	48	1	2	1	2	27.8
19	**	*	*	2023-04-10	70	73	70	72	64.3	79.7	66	69.5	67	88.5	68.3	67.5	65	85.3	64	67.3	66.3	81	63.5	67	0.18	0.16	0.16	0.15	5.64	9.02	5.92	8.8	5.04	8.2	5.56	8.1	85	71	75	77	13	1	37	22	2	2	2	2	16.67
20	***	*	*	2023-04-10	71	65	68	67	67	84.7	65	68	65	68.3	63.5	68.5	66.5	74.7	65	65.5	68.3	66.7	68	65.5	0.19	0.17	0.2	0.14	7.48	8.3	5.16	7.42	5.64	7.98	5.8	9.7	77	92	75	78	8	12	13	30	2	2	2	2	29.55
21	**	*	*	2023-04-10	61	61	62	70	65.3	53.7	65.3	68.7	48	57	66	65.3	65.7	61.3	57	65	65	84.5	66	67.5	0.15	0.12	0.15	0.14	5.64	8.34	6.16	9	6.48	9.8	5.92	10.2	77	73	80	70	22	5	22	39	1	2	1	2	31.82
22	***	*	*	2023-04-10	67	68	68	65	67	66	68	66.3	65.5	75.3	66	64	67.5	65.5	66.5	67.5	64.7	66.3	68.3	65	0.18	0.17	0.08	0.16	8.04	9.14	5.16	7.42	3.88	5.38	5.4	7.82	100	78	71	93	35	5	24	35	1	1	2	2	8.33
23	**	*	*	2023-04-11	63	66	65	64	64	52.3	67	68	62.5	63	65.5	65.3	66.5	65.3	66	62	65	60	68.3	66	0.18	0.12	0.16	0.17	5.16	8.42	6.84	8.82	5.92	8.52	5.04	7.88	79	100	72	100	15	29	26	22	2	2	2	2	39.3
24	**	*	*	2023-04-11	70	67	63	67	67.3	80.8	64.7	64	65.3	67.3	67.3	67.7	66	54.7	65.5	64.3	64.3	79.5	65.5	67	0.18	0.17	0.11	0.2	4.04	9.02	5.76	9.6	5.36	8.28	5.88	8.9	78	100	100	79	33	24	46	37	2	2	2	2	12.5
25	**	*	*	2023-04-11	66	72	64	70	66	65.3	67.5	70	64	85.7	66	66.5	64.8	63.3	65.7	62	67.5	70.7	67	67	0.27	0.2	0.18	0.16	5.76	7.52	5.76	9.64	5.84	8.88	3.64	7.38	100	78	100	100	28	16	31	37	2	2	2	2	37.5
26	**	*	*	2023-04-11	72	70	64	65	67.3	85.8	68	71.7	65.3	60.7	68	66.8	65.7	65	65	59	64.8	64.7	68	66.8	0.18	0.11	0.12	0.21	5.72	8.26	6.68	8.7	3.52	5.16	5.6	8.4	100	79	100	70	30	32	23	20	2	2	2	2	27.08
27	**	*	*	2023-04-11	61	63	62	64	64.3	45.8	66	66.3	64.3	54	66.3	65.5	66.3	61.3	66.7	64.3	65.8	67.5	66.3	66	0.12	0.15	0.13	0.16	5.6	7.52	5.8	8.38	5.8	9.02	5.04	10	81	100	80	70	12	0	17	17	2	2	2	2	52.27
28	***	*	*	2023-04-11	74	67	64	60	66.7	86.5	74.7	70.5	65.8	71.5	68	78.8	66.7	66.3	67.7	62	64.5	65.3	59	57.5	0.29	0.35	0.23	0.33	5.72	11.02	5.72	10.74	5.24	8.54	6.4	8.96	100	100	89	100	25	23	23	33	2	1	2	1	30.56
29	***	*	*	2023-04-11	67	67	60	64	66	67.3	67.8	67	66	65.5	66	66.3	65.5	56	67.5	67	66.3	71	60.5	63.5	0.18	0.16	0.23	0.18	5	7.78	5.32	8.54	5.68	9.12	5.2	8.72	73	70	70	72	9	22	44	32	2	2	2	2	25
30	***	*	*	2023-04-11	74	73	69	65	66.5	85.3	65.3	75	63	80.7	80.7	63.7	66.5	80.5	57.3	70.8	66.5	66.3	65	68	0.29	0.23	0.14	0.2	5.28	12.08	6.28	8.86	5.28	7.92	4.64	5.72	100	77	75	70	28	44	25	44	2	1	1	1	10
31	***	*	*	2023-04-11	70	70	68	66	65.3	80.3	67.3	69.5	67	85.5	69	64	66.7	65.3	64.7	75.5	64.3	65.5	74	66	0.13	0.27	0.16	0.19	4.48	7.08	5.76	9.04	5.52	9.76	7.32	10.18	80	100	100	100	19	11	31	28	2	2	2	2	8.33
32	***	*	*	2023-04-11	67	66	68	62	68.3	65	64.5	67.3	69	62.3	66.5	66.8	65.7	65.3	65.7	66.3	61	53.7	59	67.3	0.16	0.19	0.27	0.27	5.32	7.82	5.04	7.88	4.2	7.42	7.08	10.26	71	93	70	100	21	29	27	32	2	2	2	2	30
33	***	*	*	2023-04-13	68	65	66	68	67.8	67.3	69.7	67.7	66.5	67	65.7	66.3	67.5	66.3	67	63.5	66.3	67.3	68.3	66.8	0.18	0.22	0.1	0.32	5.16	7.98	5.4	8.5	5.92	8.08	5.32	9.5	100	100	100	100	11	4	34	44	2	2	2	3	31.25
34	***	*	*	2023-04-13	73	72	71	69	69.7	73	68.3	88.5	61.5	88.5	76.5	66	63.5	80	67.5	67	65	70.8	76.5	66.5	0.21	0.13	0.23	0.3	3.52	7.88	4.16	7.52	5.84	8.84	5.56	8.26	100	100	73	81	0	15	40	18	2	2	2	2	43.75
35	***	*	*	2023-04-13	71	67	60	58	66	71.8	74	67	68.3	66.7	66	65.3	64	42	67.3	64.5	67.5	44.5	65.3	68	0.2	0.18	0.21	0.54	6.28	8.88	5.32	7.74	5	8.02	4.2	9.1	92	100	85	100	16	21	21	47	1	1	1	1	17.5
36	***	*	*	2023-04-13	62	64	63	64	66	49.5	68	64.3	66.8	67.3	54.8	66.3	63	63.8	64.3	64.8	67	63	65	66.3	0.18	0.18	0.18	0.15	6.2	7.3	5.36	8.44	3.68	4.84	3.84	4.04	89	100	100	100	16	24	38	29	2	2	2	2	38.64
37	***	*	*	2023-04-13	67	62	58	62	63.3	67	66.7	69.3	63	64.3	64.7	64	47.5	42.8	66.5	64.5	65	41.7	68	67	0.17	0.17	0.1	0.14	6.04	8.86	4.44	7.82	4.44	12.9	5.36	11.44	82	74	100	86	0	14	23	31	1	2	1	2	10
38	***	*	*	2023-04-13	67	64	64	64	66.3	66	69.5	65.8	65.3	67	65.5	66.3	67.5	65	68	64.5	65.7	65	65.5	66.8	0.16	0.19	0.12	0.12	6.28	8.1	5.2	8.36	3.52	7.2	5.76	9.24	100	100	71	71	0	1	35	57	2	2	2	2	33.33
39	***	*	*	2023-04-13	64	70	64	65	65	65.7	65	66.5	63.3	83.5	66.3	65.5	66.5	67	68.5	65.8	67.5	65.3	67.7	65.7	0.17	0.17	0.15	0.15	0	0	4.4	6.14	5.72	6.9	5.12	8.64	89	70	100	89	0	15	50	57	3	3	2	3	8.33
40	**	*	*	2023-04-13	64	60	66	61	67.3	61.8	64.7	66.3	64.5	44	67.3	65.5	65.7	66.7	66.7	68	66	44.3	68.3	65.8	0.15	0.15	0.13	0.18	12.36	12.42	5.8	9.62	6.72	9.72	4.24	7.72	100	100	100	100	11	0	35	48	2	2	2	2	35.42
41	***	*	*	2023-04-13	66	56	65	69	64.3	66	65	64.5	66.5	47.3	61.8	49.5	67.3	64.8	66.8	66.8	64.7	47.3	53.3	64.5	0.45	1.2	0.23	0.41	4.28	4.78	4.08	5.32	4.32	6	3.88	7.06	100	100	100	86	40	58	37	50	2	2	2	2	22.73
42	**	*	*	2023-04-13	64	66	68	62	63.5	63	67.5	66.7	70	64.5	68	66	70	67	66.8	67.5	65.3	62	63	65.5	0.16	0.19	0.16	0.26	5.58	8.38	5	8.46	6.16	8.52	6.92	10.98	100	70	100	86	18	33	36	31	1	2	1	2	29.55
43	**	*	*	2023-04-13	65	68	66	62	66	64.7	67.8	64.5	66	67	67.3	68	66	65.3	69	65.3	62	64.5	68.5	65.8	0.08	0.14	0.13	0.18	4.2	6.94	5.04	8.28	5.32	6.7	5.72	7.62	100	100	93	86	22	30	22	41	2	2	2	2	27.08
44	***	*	*	2023-04-13	61	62	60	62	66	41.5	66.5	66.5	65	60	66	67	64.8	42.5	66	66	66.3	47.3	66.3	67.5	0.12	0.12	0.11	0.17	6.16	7.88	5.44	8.4	4.44	6.54	3.6	5.64	71	71	100	70	31	30	60	48	2	2	2	2	22.22
45	**	*	*	2023-04-13	66	62	71	68	65	69.3	68.5	65.7	65.7	65	66	63.3	66	84	66.7	69	64.5	77.5	68	67.8	0.15	0.16	0.11	0.23	6.92	8.98	7.2	12.44	6.2	6.82	4.16	5.24	70	100	100	74	20	15	27	16	1	1	1	1	12.5
46	**	*	*	2023-04-13	71	71	63	66	66.7	80	66.3	80	63	84	61.7	67	65	63	65.5	64.7	62	68	69.3	66.8	0.17	0.32	0.27	0.27	3.52	7.28	5.28	10.44	5.2	8.6	4.44	8.42	74	71	100	77	20	23	55	31	2	2	2	2	18.75
47	***	*	*	2023-04-13	72	68	66	60	65	84	67.5	70.5	64	80	67.5	62.8	64.7	65.8	68	65	63.5	65.8	65.5	51.8	0.18	0.22	0.2	0.28	5.4	7.7	5.12	8.32	5.64	8.82	4.4	8.44	100	87	96	100	0	5	36	33	2	2	2	2	20.45
48	***	*	*	2023-04-13	66	69	66	65	63.5	61.5	65.5	65.5	65	79.3	69.5	65.8	63.8	74	67.5	61	65.7	65.5	68.7	67.5	0.18	0.17	0.11	0.18	5.24	9.22	4.32	8.04	5.76	8.76	5.08	9.26	100	92	100	72	16	19	44	23	2	0	2	0	16.67
49	**	*	*	2023-04-13	69	67	67	69	66.8	77.3	68	65.3	66.3	67.8	67	66.5	66.5	66	66.3	67.3	63.5	84.3	67	65	0.16	0.31	0.13	0.33	5.48	7.98	4	8.16	5.72	8.14	3.76	9	100	100	100	84	11	11	16	18	2	2	2	2	47.92
50	**	*	*	2023-04-13	62	70	65	67	65	56.5	65.5	67	65	83	70.7	65.7	64.5	62.5	67.3	66	67.5	73	64.8	67.7	0.11	0.13	0.09	0.12	5.76	7.92	6.64	8.84	5.04	9.36	5.72	9.1	100	100	100	100	8	10	36	47	2	2	2	2	12.5
51	**	*	*	2023-04-13	63	65	68	62	63	73.7	65.7	65.5	66.8	66.3	66.7	66	64	76.5	65	65	68.5	41.7	64.7	65.8	0.13	0.16	0.24	0.29	5.76	8.08	5.68	8.2	5.36	7.12	5.2	7.12	88	100	100	100	29	32	29	17	2	2	2	0	6.25
52	***	*	*	2023-04-13	58	65	58	61	66	40.8	65.8	62.3	66.7	66	68.3	66.8	65.5	40.5	66	65.3	64	66.3	65.7	66.7	0.11	0.15	0.1	0.09	3.88	5.06	4.56	5.4	3.84	4.08	5.12	6.36	100	100	83	86	22	22	67	61	2	2	2	2	19.44
53	***	*	*	2023-04-13	67	65	61	64	63.3	66.3	66	72.7	64	63.8	65	66.5	63.8	57.5	65.3	68	64	66.3	66	63.3	0.14	0.32	0.11	0.32	7.44	9.76	4.92	8.38	6.36	7.94	4	6.88	100	72	100	100	24	25	40	45	2	2	2	2	18.75
54	***	*	*	2023-04-13	68	65	65	64	64.3	73.7	65	64	63.5	65.3	67.5	64.7	68.8	59	69.5	65.7	67.7	55.3	66.3	65.3	0.19	0.16	0.18	0.18	5.08	8.46	5.24	8.34	5.92	9.64	5	8.42	87	86	100	73	21	13	20	31	1	2	1	2	25
55	***	*	*	2023-04-14	61	65	62	58	67.3	65.5	66.5	54.3	64.3	64.5	64	66.5	66.3	50	66.5	65.5	64.5	40.8	62.3	68	0.27	0.32	0.17	0.2	4.32	7.2	5.08	7.26	3.52	5.84	5.28	7.32	84	70	73	73	28	19	73	63	2	2	2	2	22.91
